# Supplementary material
Source: ML conference proceedings conference paper supplement (https://openaccess.thecvf.com/content/CVPR2023/html/Wang_Progressive_Disentangled_Representation_CVPR_2023_paper.html)
Supplement: Supplementary file 1 [file Wang_Progressive_Disentangled_Representation_CVPR_2023_supplemental.zip]

Archive with 4 entries (4 files):
- PD-FGC_4169_2.mp4
- __MACOSX/._PD-FGC_4169_2.mp4
- SupplementalMaterial_4169_1.pdf
- __MACOSX/._SupplementalMaterial_4169_1.pdf
